# Supplementary material
Source: PubMed Central journal article supplement (PMC5260489)

# Suppl. Figure 1

## A

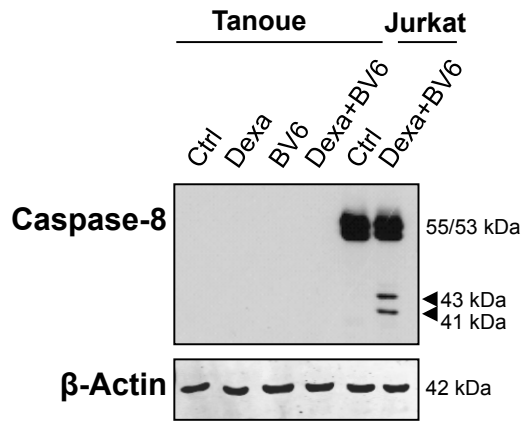

## B

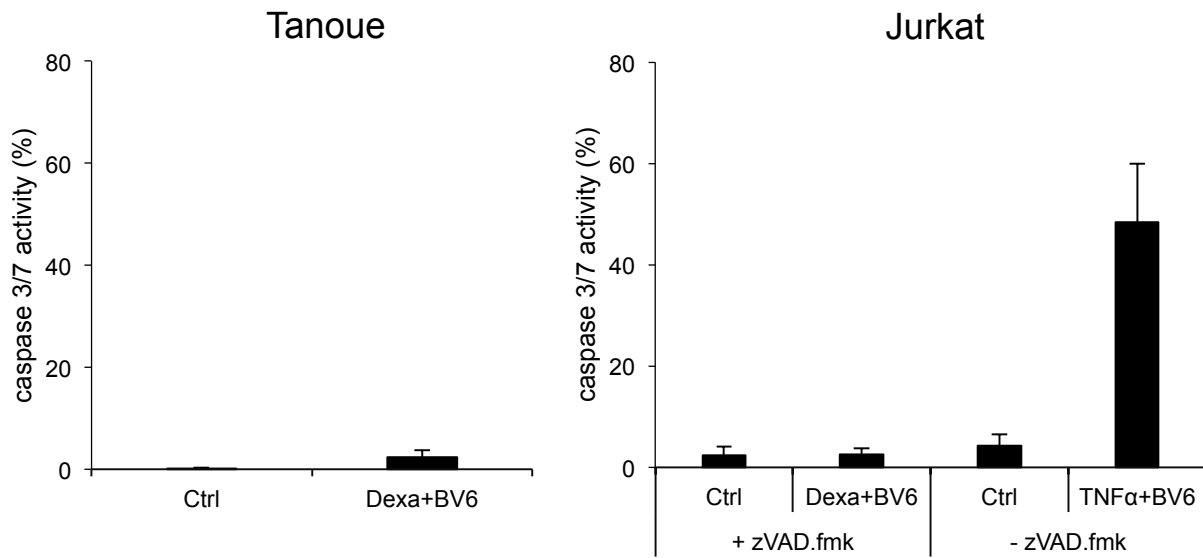

Suppl. Figure 1

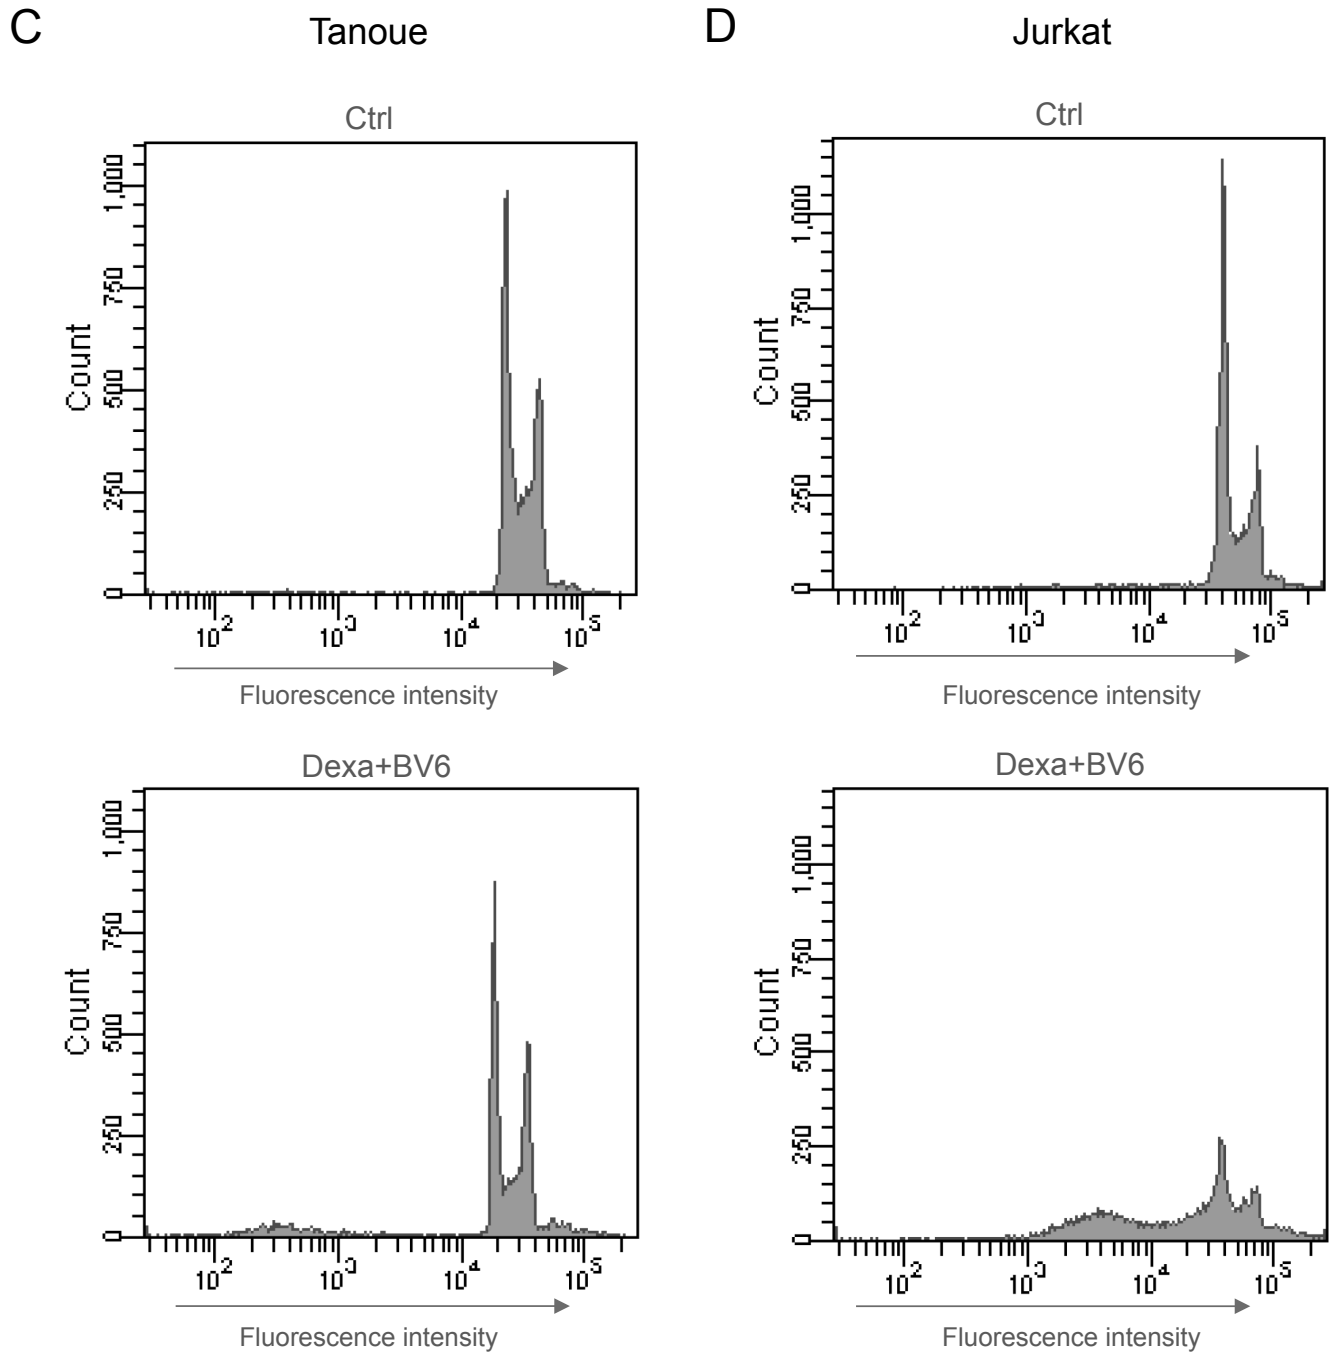

## Suppl. Figure 2

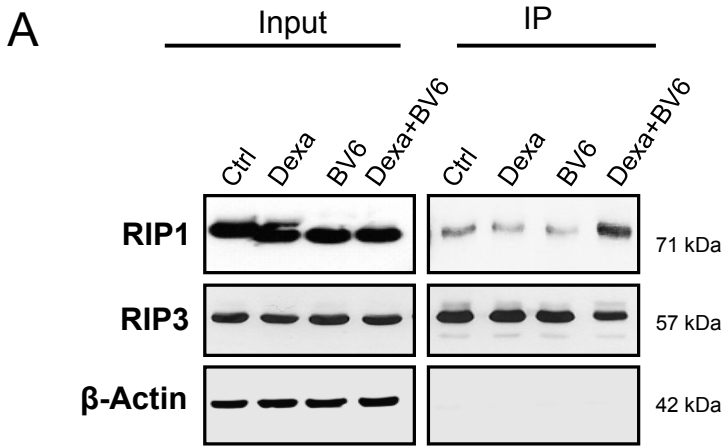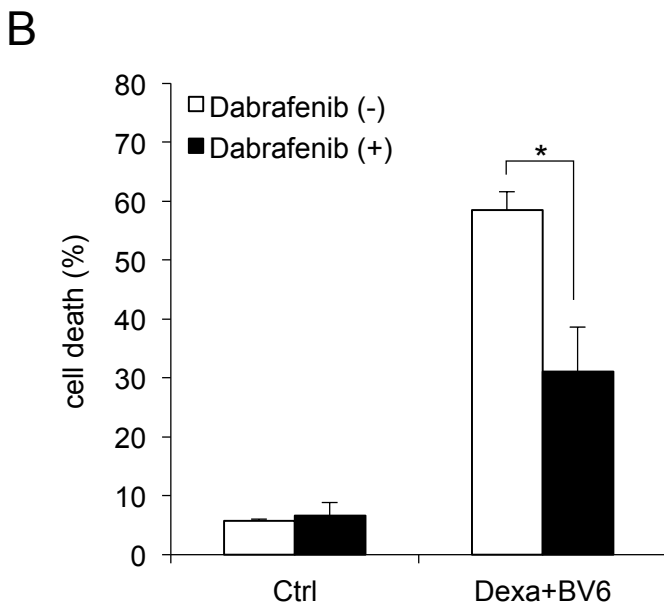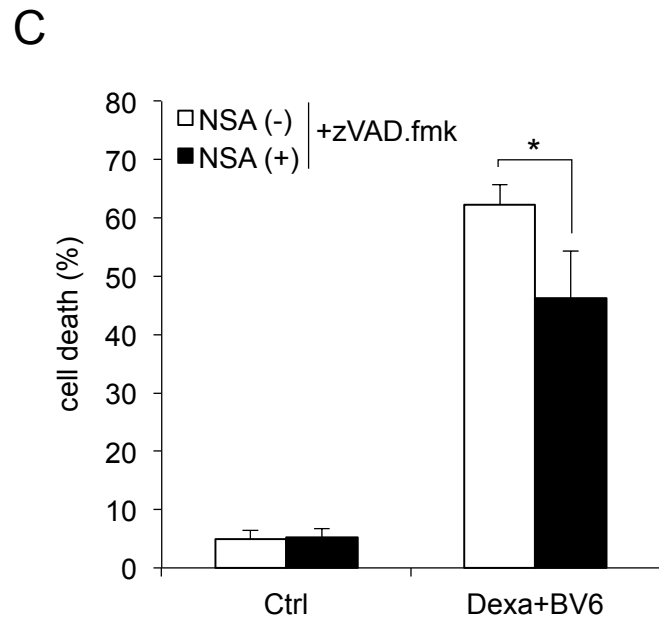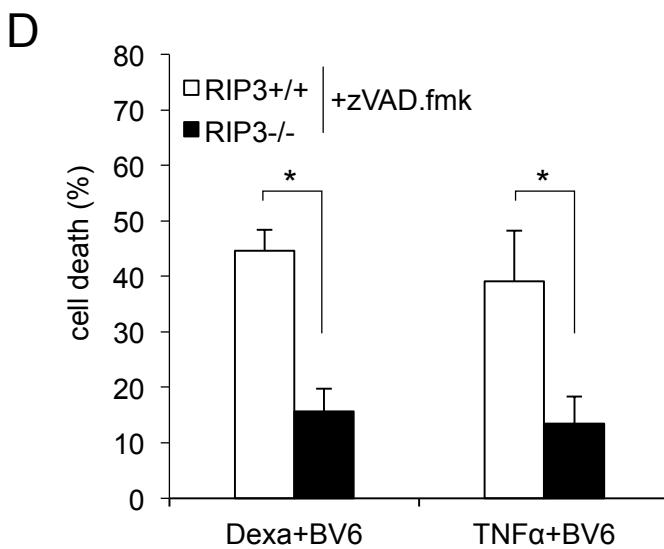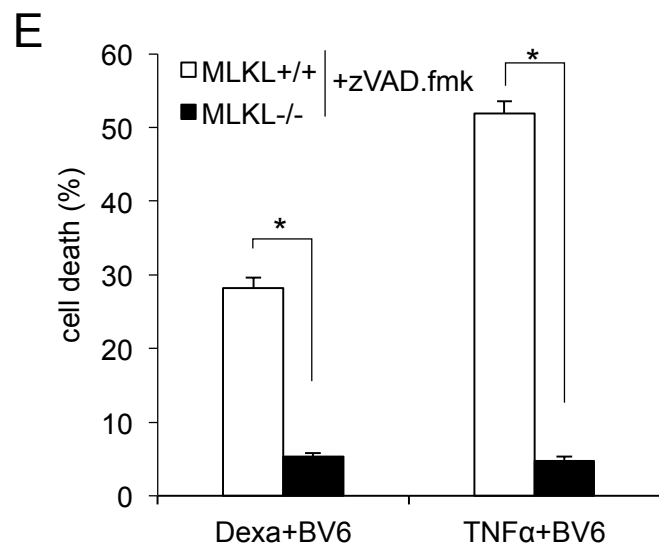

Suppl. Figure 2

F

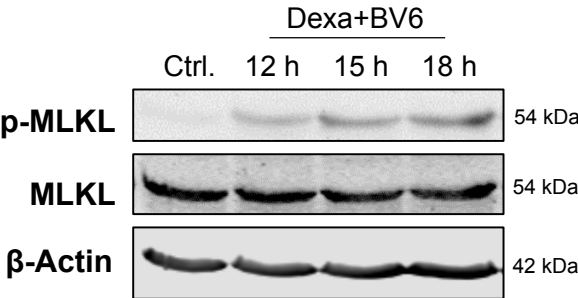

### Suppl. Figure 3

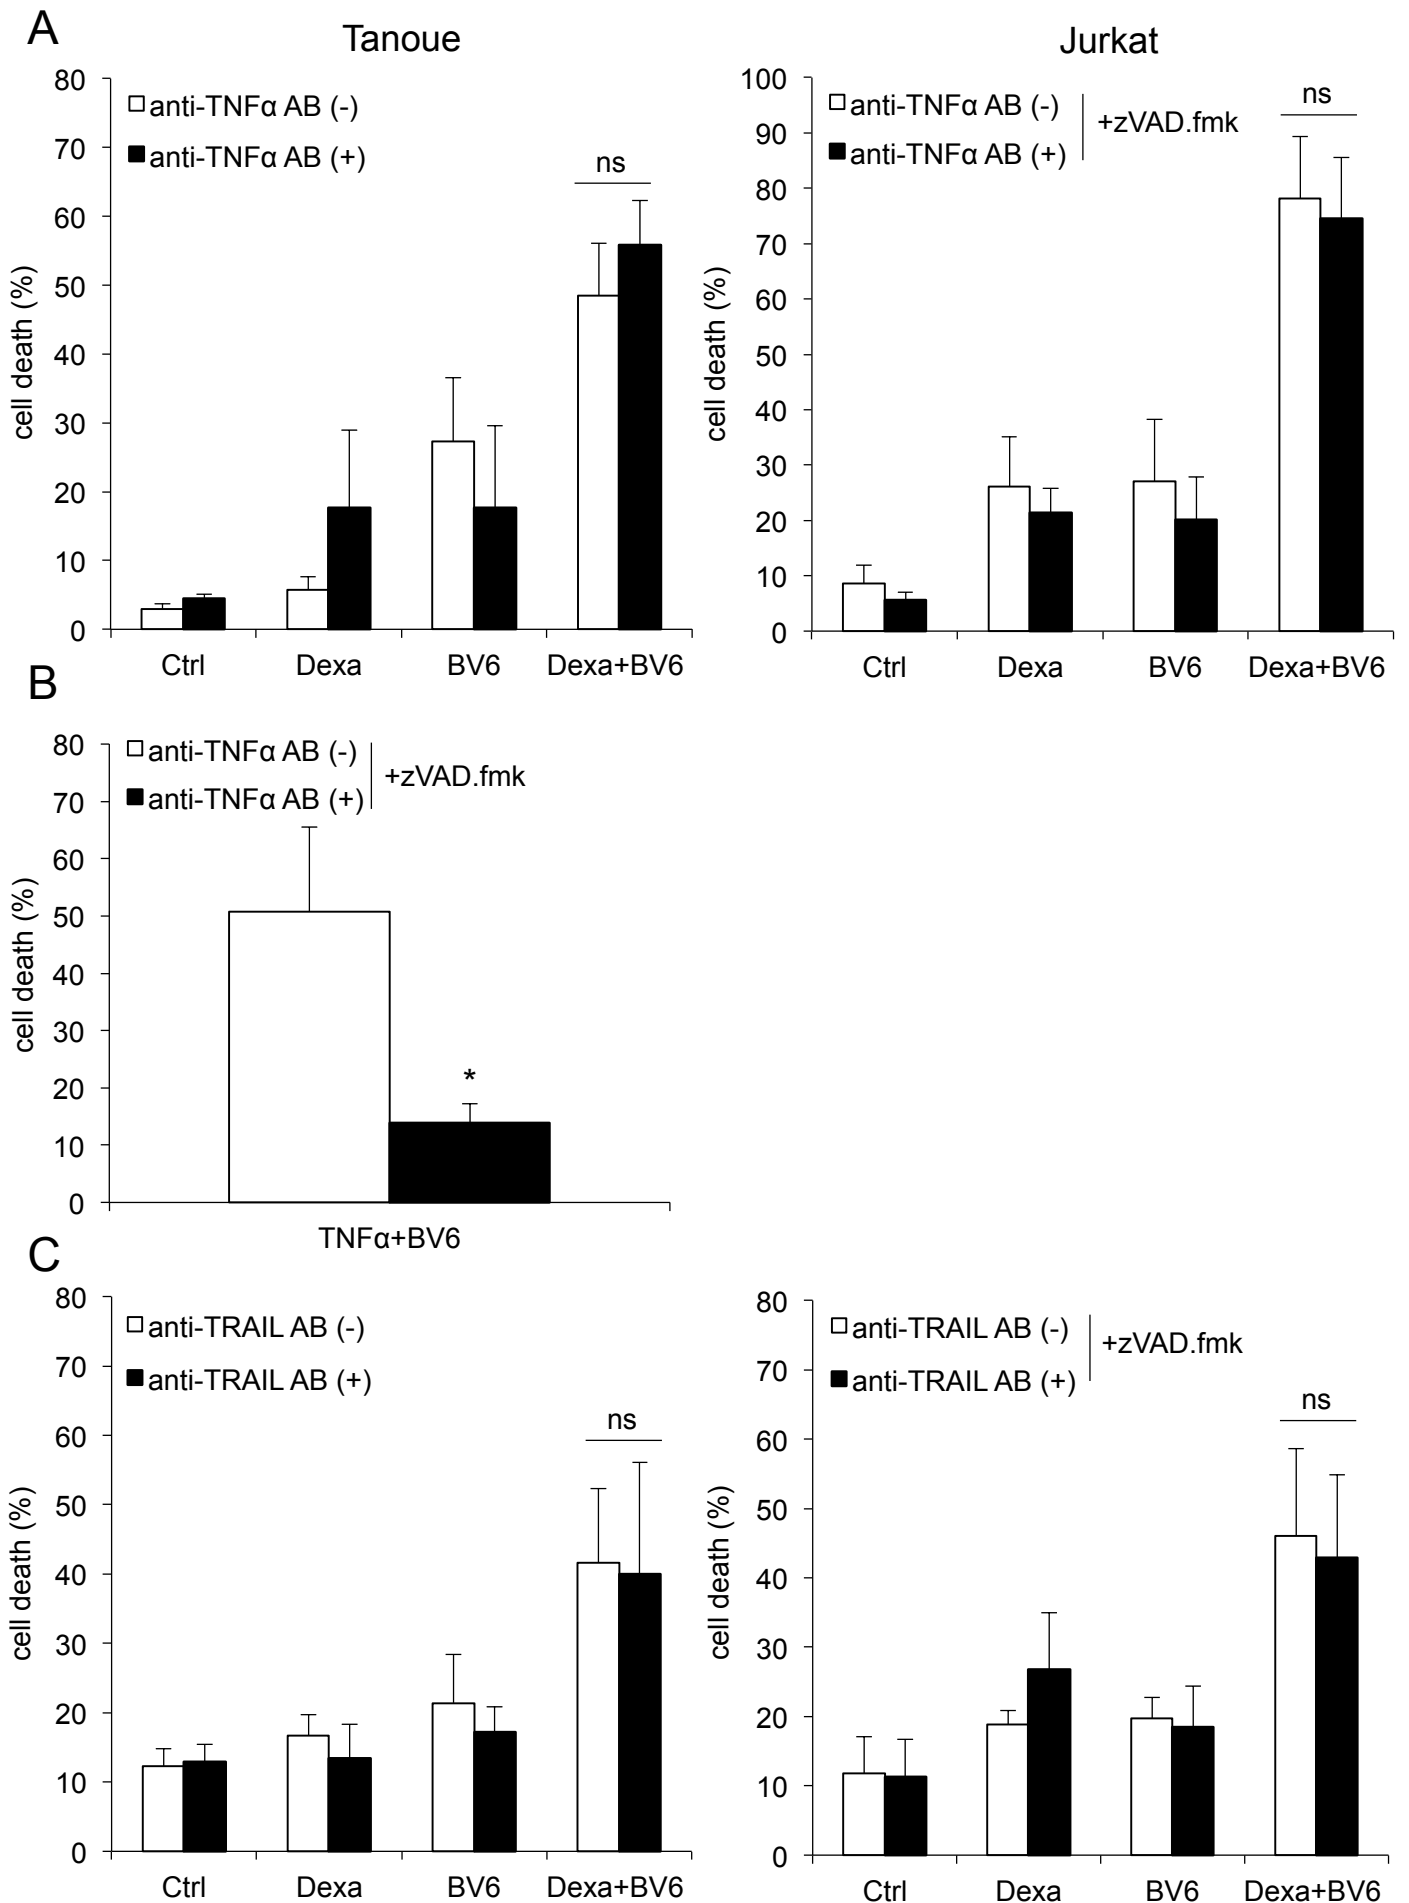

### Suppl. Figure 3

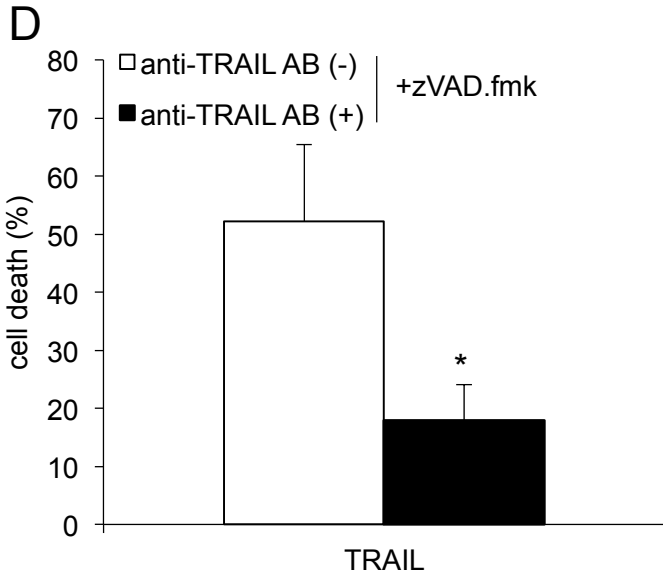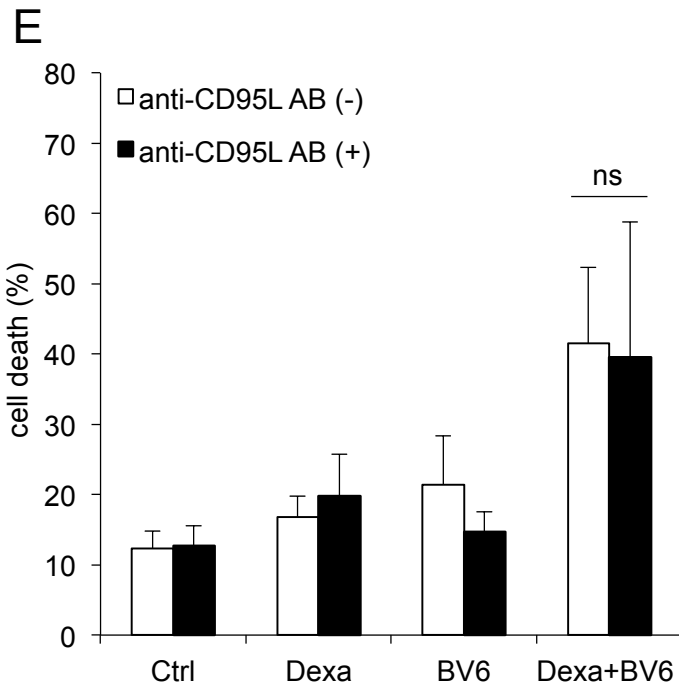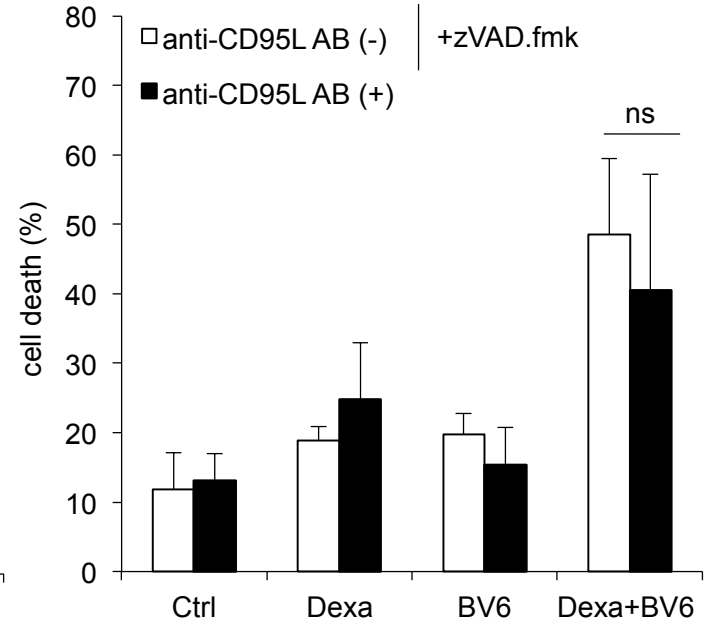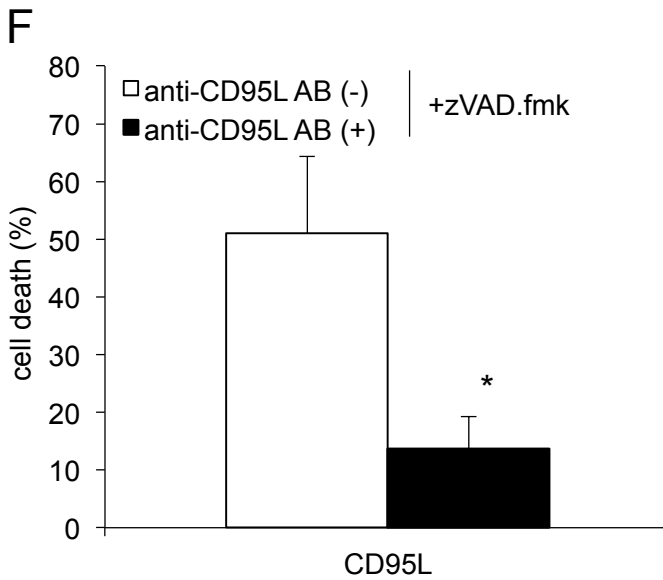



# Suppl. Figure 4

## C

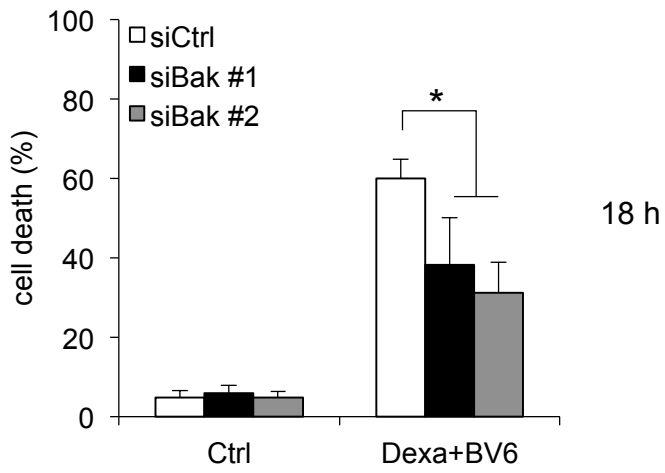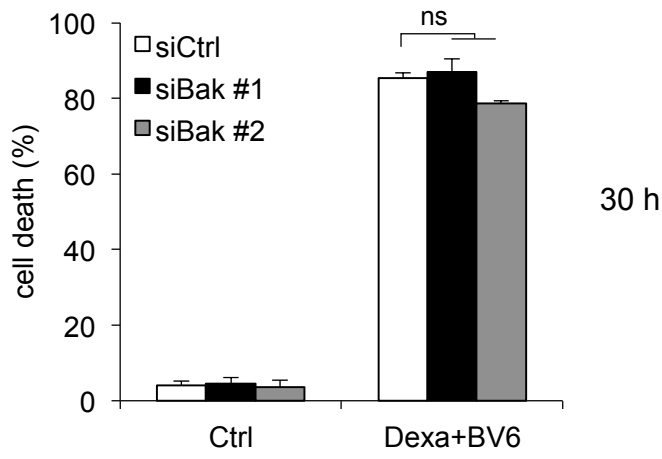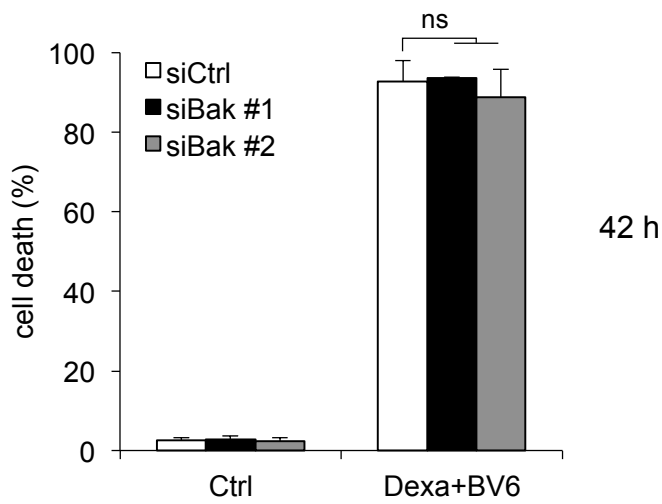



## Suppl. Figure 4

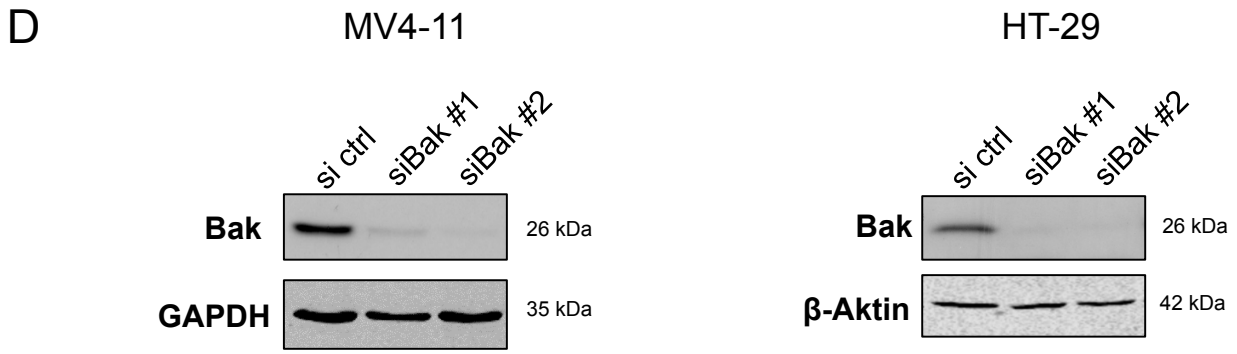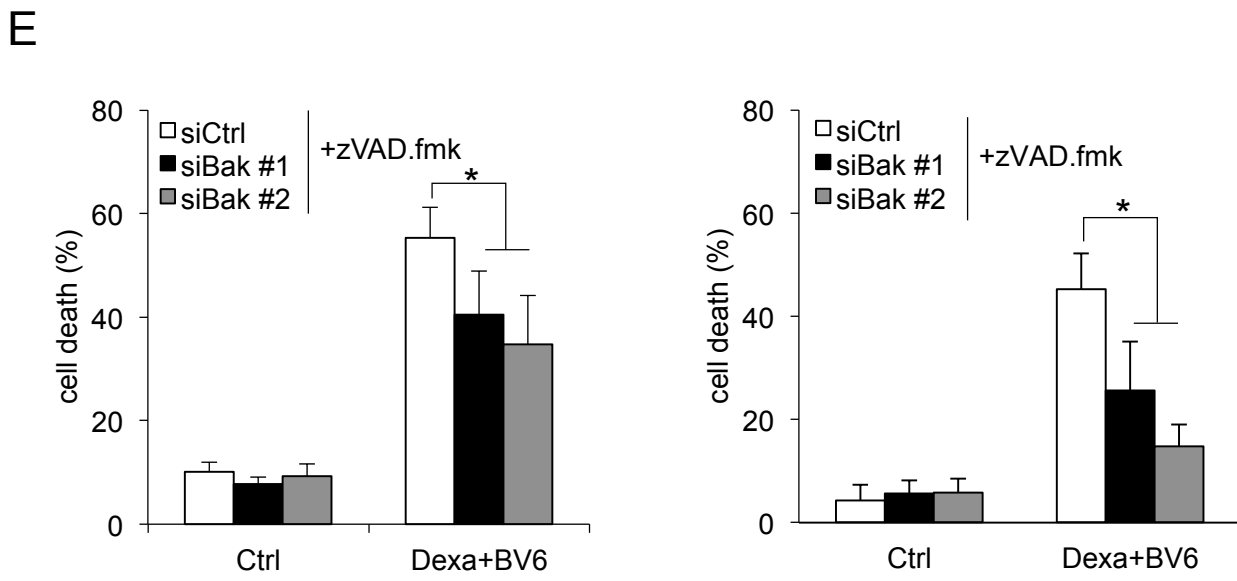

Suppl. Figure 5

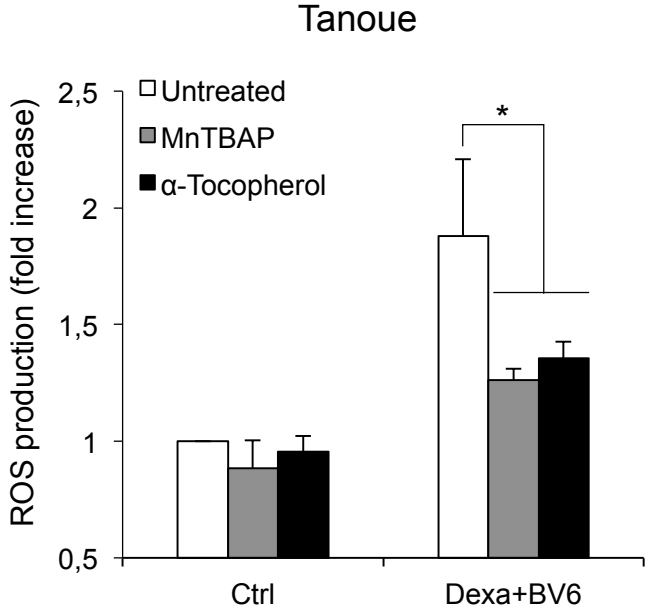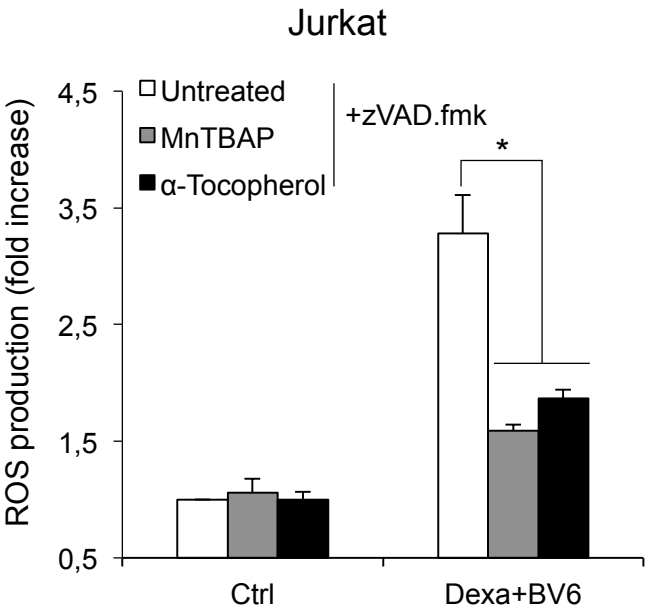

Suppl. Figure 6

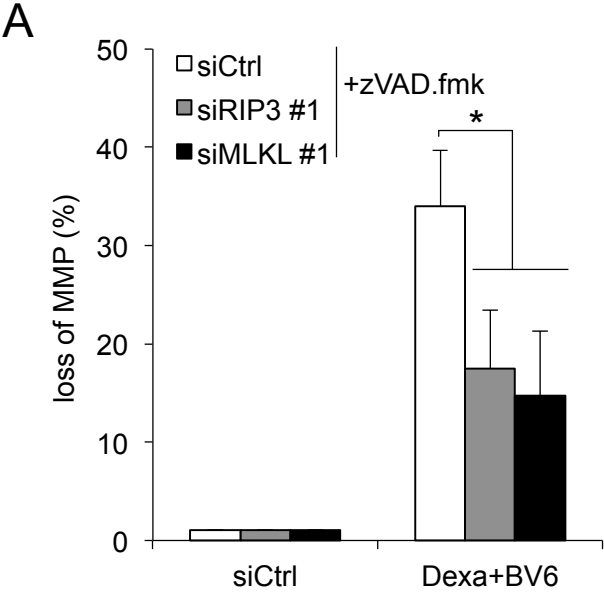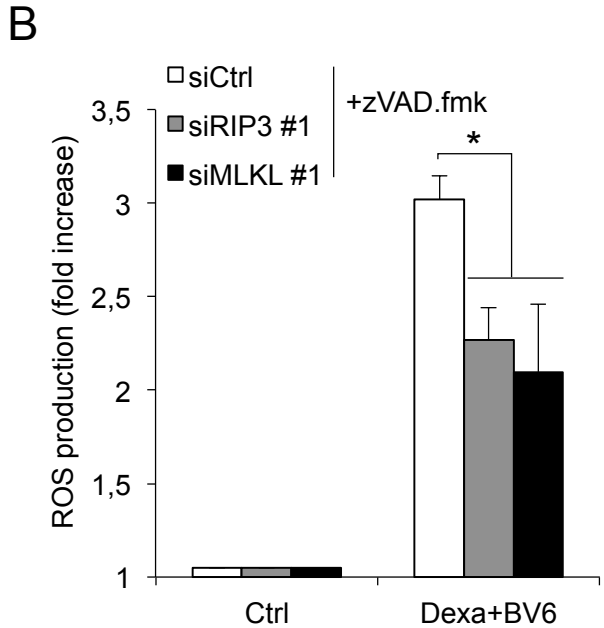

Supplement: cdd2016102x1.pdf [file cdd2016102x1.pdf]
